# Supplementary material for: Beneficial dose-dependent effects of Ag nanoparticles on germination do not compromise growth and metabolic profiles of Capsicum annuum seedlings
Source: PeerJ. 2025 Sep 9;13:e19974. doi: 10.7717/peerj.19974 (PMC12428529; doi:10.7717/peerj.19974)
Supplement: Supplemental Information 12 — The first sheet contains seed germination data. The first column indicates the plant type used, where wildtype refers to Chiltepin and domesticated to Serrano. The ID column represents the individual seed number. The control in the treatment column indicates a concentration of 0 nanoparticles, meaning only distilled sterile water was used. The remaining columns, labeled from 0 to 14, represent the days of seed exposure to the treatments. In each row, a value of 0 indicates a non-germinated seed, while a value of 1 indicates a germinated seed. The second sheet contains data from the survival test. [file peerj-13-19974-s012.xlsx]

## Sheet: Hoja 1
Plant type	Petri dish	ID	AgNP Treatment (ppm)	0	1	2	3	4	5	6	7	8	9	10	11	12	13	14
Domesticated	1	1	250	0	0	0	0	0	0	0	0	1	1	1	1	1	1	1
Domesticated	1	2	250	0	0	0	0	0	0	0	0	0	1	1	1	1	1	1
Domesticated	1	3	250	0	0	0	0	0	0	0	0	0	1	1	1	1	1	1
Domesticated	1	4	250	0	0	0	0	0	0	0	0	0	1	1	1	1	1	1
Domesticated	1	5	250	0	0	0	0	0	0	0	0	0	1	1	1	1	1	1
Domesticated	1	6	250	0	0	0	0	0	0	0	0	0	1	1	1	1	1	1
Domesticated	1	7	250	0	0	0	0	0	0	0	0	0	1	1	1	1	1	1
Domesticated	1	8	250	0	0	0	0	0	0	0	0	0	0	1	1	1	1	1
Domesticated	1	9	250	0	0	0	0	0	0	0	0	0	0	1	1	1	1	1
Domesticated	1	10	250	0	0	0	0	0	0	0	0	0	0	0	1	1	1	1
Domesticated	2	1	250	0	0	0	0	0	0	0	0	1	1	1	1	1	1	1
Domesticated	2	2	250	0	0	0	0	0	0	0	0	0	1	1	1	1	1	1
Domesticated	2	3	250	0	0	0	0	0	0	0	0	0	1	1	1	1	1	1
Domesticated	2	4	250	0	0	0	0	0	0	0	0	0	1	1	1	1	1	1
Domesticated	2	5	250	0	0	0	0	0	0	0	0	0	1	1	1	1	1	1
Domesticated	2	6	250	0	0	0	0	0	0	0	0	0	1	1	1	1	1	1
Domesticated	2	7	250	0	0	0	0	0	0	0	0	0	1	1	1	1	1	1
Domesticated	2	8	250	0	0	0	0	0	0	0	0	0	0	1	1	1	1	1
Domesticated	2	9	250	0	0	0	0	0	0	0	0	0	0	0	0	0	0	0
Domesticated	2	10	250	0	0	0	0	0	0	0	0	0	0	0	0	0	0	0
Domesticated	3	1	250	0	0	0	0	0	0	0	0	0	1	1	1	1	1	1
Domesticated	3	2	250	0	0	0	0	0	0	0	0	0	0	1	1	1	1	1
Domesticated	3	3	250	0	0	0	0	0	0	0	0	0	0	0	1	1	1	1
Domesticated	3	4	250	0	0	0	0	0	0	0	0	0	0	0	1	1	1	1
Domesticated	3	5	250	0	0	0	0	0	0	0	0	0	0	0	0	1	1	1
Domesticated	3	6	250	0	0	0	0	0	0	0	0	0	0	0	0	0	0	1
Domesticated	3	7	250	0	0	0	0	0	0	0	0	0	0	0	0	0	0	0
Domesticated	3	8	250	0	0	0	0	0	0	0	0	0	0	0	0	0	0	0
Domesticated	3	9	250	0	0	0	0	0	0	0	0	0	0	0	0	0	0	0
Domesticated	3	10	250	0	0	0	0	0	0	0	0	0	0	0	0	0	0	0
Domesticated	4	1	250	0	0	0	0	0	0	0	0	0	1	1	1	1	1	1
Domesticated	4	2	250	0	0	0	0	0	0	0	0	0	1	1	1	1	1	1
Domesticated	4	3	250	0	0	0	0	0	0	0	0	0	1	1	1	1	1	1
Domesticated	4	4	250	0	0	0	0	0	0	0	0	0	0	1	1	1	1	1
Domesticated	4	5	250	0	0	0	0	0	0	0	0	0	0	1	1	1	1	1
Domesticated	4	6	250	0	0	0	0	0	0	0	0	0	0	1	1	1	1	1
Domesticated	4	7	250	0	0	0	0	0	0	0	0	0	0	1	1	1	1	1
Domesticated	4	8	250	0	0	0	0	0	0	0	0	0	0	1	1	1	1	1
Domesticated	4	9	250	0	0	0	0	0	0	0	0	0	0	1	1	1	1	1
Domesticated	4	10	250	0	0	0	0	0	0	0	0	0	0	0	1	1	1	1
Domesticated	5	1	250	0	0	0	0	0	0	0	0	0	1	1	1	1	1	1
Domesticated	5	2	250	0	0	0	0	0	0	0	0	0	1	1	1	1	1	1
Domesticated	5	3	250	0	0	0	0	0	0	0	0	0	1	1	1	1	1	1
Domesticated	5	4	250	0	0	0	0	0	0	0	0	0	1	1	1	1	1	1
Domesticated	5	5	250	0	0	0	0	0	0	0	0	0	1	1	1	1	1	1
Domesticated	5	6	250	0	0	0	0	0	0	0	0	0	0	1	1	1	1	1
Domesticated	5	7	250	0	0	0	0	0	0	0	0	0	0	1	1	1	1	1
Domesticated	5	8	250	0	0	0	0	0	0	0	0	0	0	1	1	1	1	1
Domesticated	5	9	250	0	0	0	0	0	0	0	0	0	0	0	0	0	0	0
Domesticated	5	10	250	0	0	0	0	0	0	0	0	0	0	0	0	0	0	0
Domesticated	1	1	100	0	0	0	0	0	0	0	0	1	1	1	1	1	1	1
Domesticated	1	2	100	0	0	0	0	0	0	0	0	0	1	1	1	1	1	1
Domesticated	1	3	100	0	0	0	0	0	0	0	0	0	1	1	1	1	1	1
Domesticated	1	4	100	0	0	0	0	0	0	0	0	0	1	1	1	1	1	1
Domesticated	1	5	100	0	0	0	0	0	0	0	0	0	1	1	1	1	1	1
Domesticated	1	6	100	0	0	0	0	0	0	0	0	0	1	1	1	1	1	1
Domesticated	1	7	100	0	0	0	0	0	0	0	0	0	1	1	1	1	1	1
Domesticated	1	8	100	0	0	0	0	0	0	0	0	0	0	0	0	0	0	0
Domesticated	1	9	100	0	0	0	0	0	0	0	0	0	0	0	0	0	0	0
Domesticated	1	10	100	0	0	0	0	0	0	0	0	0	0	0	0	0	0	0
Domesticated	2	1	100	0	0	0	0	0	0	0	0	1	1	1	1	1	1	1
Domesticated	2	2	100	0	0	0	0	0	0	0	0	0	1	1	1	1	1	1
Domesticated	2	3	100	0	0	0	0	0	0	0	0	0	1	1	1	1	1	1
Domesticated	2	4	100	0	0	0	0	0	0	0	0	0	1	1	1	1	1	1
Domesticated	2	5	100	0	0	0	0	0	0	0	0	0	1	1	1	1	1	1
Domesticated	2	6	100	0	0	0	0	0	0	0	0	0	1	1	1	1	1	1
Domesticated	2	7	100	0	0	0	0	0	0	0	0	0	1	1	1	1	1	1
Domesticated	2	8	100	0	0	0	0	0	0	0	0	0	0	0	0	0	0	0
Domesticated	2	9	100	0	0	0	0	0	0	0	0	0	0	0	0	0	0	0
Domesticated	2	10	100	0	0	0	0	0	0	0	0	0	0	0	0	0	0	0
Domesticated	3	1	100	0	0	0	0	0	0	0	0	1	1	1	1	1	1	1
Domesticated	3	2	100	0	0	0	0	0	0	0	0	1	1	1	1	1	1	1
Domesticated	3	3	100	0	0	0	0	0	0	0	0	1	1	1	1	1	1	1
Domesticated	3	4	100	0	0	0	0	0	0	0	0	1	1	1	1	1	1	1
Domesticated	3	5	100	0	0	0	0	0	0	0	0	1	1	1	1	1	1	1
Domesticated	3	6	100	0	0	0	0	0	0	0	0	0	1	1	1	1	1	1
Domesticated	3	7	100	0	0	0	0	0	0	0	0	0	1	1	1	1	1	1
Domesticated	3	8	100	0	0	0	0	0	0	0	0	0	1	1	1	1	1	1
Domesticated	3	9	100	0	0	0	0	0	0	0	0	0	1	1	1	1	1	1
Domesticated	3	10	100	0	0	0	0	0	0	0	0	0	0	0	0	0	0	0
Domesticated	4	1	100	0	0	0	0	0	0	0	0	1	1	1	1	1	1	1
Domesticated	4	2	100	0	0	0	0	0	0	0	0	1	1	1	1	1	1	1
Domesticated	4	3	100	0	0	0	0	0	0	0	0	0	1	1	1	1	1	1
Domesticated	4	4	100	0	0	0	0	0	0	0	0	0	1	1	1	1	1	1
Domesticated	4	5	100	0	0	0	0	0	0	0	0	0	1	1	1	1	1	1
Domesticated	4	6	100	0	0	0	0	0	0	0	0	0	1	1	1	1	1	1
Domesticated	4	7	100	0	0	0	0	0	0	0	0	0	1	1	1	1	1	1
Domesticated	4	8	100	0	0	0	0	0	0	0	0	0	1	1	1	1	1	1
Domesticated	4	9	100	0	0	0	0	0	0	0	0	0	0	0	0	1	1	1
Domesticated	4	10	100	0	0	0	0	0	0	0	0	0	0	0	0	0	0	0
Domesticated	5	1	100	0	0	0	0	0	0	0	0	1	1	1	1	1	1	1
Domesticated	5	2	100	0	0	0	0	0	0	0	0	1	1	1	1	1	1	1
Domesticated	5	3	100	0	0	0	0	0	0	0	0	1	1	1	1	1	1	1
Domesticated	5	4	100	0	0	0	0	0	0	0	0	1	1	1	1	1	1	1
Domesticated	5	5	100	0	0	0	0	0	0	0	0	1	1	1	1	1	1	1
Domesticated	5	6	100	0	0	0	0	0	0	0	0	0	1	1	1	1	1	1
Domesticated	5	7	100	0	0	0	0	0	0	0	0	0	1	1	1	1	1	1
Domesticated	5	8	100	0	0	0	0	0	0	0	0	0	0	1	1	1	1	1
Domesticated	5	9	100	0	0	0	0	0	0	0	0	0	0	1	1	1	1	1
Domesticated	5	10	100	0	0	0	0	0	0	0	0	0	0	0	0	1	1	1
Domesticated	1	1	50	0	0	0	0	0	0	0	0	1	1	1	1	1	1	1
Domesticated	1	2	50	0	0	0	0	0	0	0	0	1	1	1	1	1	1	1
Domesticated	1	3	50	0	0	0	0	0	0	0	0	1	1	1	1	1	1	1
Domesticated	1	4	50	0	0	0	0	0	0	0	0	0	1	1	1	1	1	1
Domesticated	1	5	50	0	0	0	0	0	0	0	0	0	1	1	1	1	1	1
Domesticated	1	6	50	0	0	0	0	0	0	0	0	0	1	1	1	1	1	1
Domesticated	1	7	50	0	0	0	0	0	0	0	0	0	1	1	1	1	1	1
Domesticated	1	8	50	0	0	0	0	0	0	0	0	0	0	1	1	1	1	1
Domesticated	1	9	50	0	0	0	0	0	0	0	0	0	0	1	1	1	1	1
Domesticated	1	10	50	0	0	0	0	0	0	0	0	0	0	0	0	0	1	1
Domesticated	2	1	50	0	0	0	0	0	0	0	0	1	1	1	1	1	1	1
Domesticated	2	2	50	0	0	0	0	0	0	0	0	1	1	1	1	1	1	1
Domesticated	2	3	50	0	0	0	0	0	0	0	0	1	1	1	1	1	1	1
Domesticated	2	4	50	0	0	0	0	0	0	0	0	0	1	1	1	1	1	1
Domesticated	2	5	50	0	0	0	0	0	0	0	0	0	1	1	1	1	1	1
Domesticated	2	6	50	0	0	0	0	0	0	0	0	0	0	0	0	0	0	0
Domesticated	2	7	50	0	0	0	0	0	0	0	0	0	0	0	0	0	0	0
Domesticated	2	8	50	0	0	0	0	0	0	0	0	0	0	0	0	0	0	0
Domesticated	2	9	50	0	0	0	0	0	0	0	0	0	0	0	0	0	0	0
Domesticated	2	10	50	0	0	0	0	0	0	0	0	0	0	0	0	0	0	0
Domesticated	3	1	50	0	0	0	0	0	0	0	0	1	1	1	1	1	1	1
Domesticated	3	2	50	0	0	0	0	0	0	0	0	0	1	1	1	1	1	1
Domesticated	3	3	50	0	0	0	0	0	0	0	0	0	1	1	1	1	1	1
Domesticated	3	4	50	0	0	0	0	0	0	0	0	0	1	1	1	1	1	1
Domesticated	3	5	50	0	0	0	0	0	0	0	0	0	1	1	1	1	1	1
Domesticated	3	6	50	0	0	0	0	0	0	0	0	0	1	1	1	1	1	1
Domesticated	3	7	50	0	0	0	0	0	0	0	0	0	0	1	1	1	1	1
Domesticated	3	8	50	0	0	0	0	0	0	0	0	0	0	1	1	1	1	1
Domesticated	3	9	50	0	0	0	0	0	0	0	0	0	0	1	1	1	1	1
Domesticated	3	10	50	0	0	0	0	0	0	0	0	0	0	1	1	1	1	1
Domesticated	4	1	50	0	0	0	0	0	0	0	0	1	1	1	1	1	1	1
Domesticated	4	2	50	0	0	0	0	0	0	0	0	1	1	1	1	1	1	1
Domesticated	4	3	50	0	0	0	0	0	0	0	0	1	1	1	1	1	1	1
Domesticated	4	4	50	0	0	0	0	0	0	0	0	0	1	1	1	1	1	1
Domesticated	4	5	50	0	0	0	0	0	0	0	0	0	1	1	1	1	1	1
Domesticated	4	6	50	0	0	0	0	0	0	0	0	0	1	1	1	1	1	1
Domesticated	4	7	50	0	0	0	0	0	0	0	0	0	1	1	1	1	1	1
Domesticated	4	8	50	0	0	0	0	0	0	0	0	0	0	1	1	1	1	1
Domesticated	4	9	50	0	0	0	0	0	0	0	0	0	0	0	0	0	0	1
Domesticated	4	10	50	0	0	0	0	0	0	0	0	0	0	0	0	0	0	0
Domesticated	5	1	50	0	0	0	0	0	0	0	0	1	1	1	1	1	1	1
Domesticated	5	2	50	0	0	0	0	0	0	0	0	1	1	1	1	1	1	1
Domesticated	5	3	50	0	0	0	0	0	0	0	0	1	1	1	1	1	1	1
Domesticated	5	4	50	0	0	0	0	0	0	0	0	1	1	1	1	1	1	1
Domesticated	5	5	50	0	0	0	0	0	0	0	0	1	1	1	1	1	1	1
Domesticated	5	6	50	0	0	0	0	0	0	0	0	0	1	1	1	1	1	1
Domesticated	5	7	50	0	0	0	0	0	0	0	0	0	1	1	1	1	1	1
Domesticated	5	8	50	0	0	0	0	0	0	0	0	0	1	1	1	1	1	1
Domesticated	5	9	50	0	0	0	0	0	0	0	0	0	0	0	1	1	1	1
Domesticated	5	10	50	0	0	0	0	0	0	0	0	0	0	0	0	0	0	0
Domesticated	1	1	control	0	0	0	0	0	0	0	0	1	1	1	1	1	1	1
Domesticated	1	2	control	0	0	0	0	0	0	0	0	1	1	1	1	1	1	1
Domesticated	1	3	control	0	0	0	0	0	0	0	0	1	1	1	1	1	1	1
Domesticated	1	4	control	0	0	0	0	0	0	0	0	1	1	1	1	1	1	1
Domesticated	1	5	control	0	0	0	0	0	0	0	0	1	1	1	1	1	1	1
Domesticated	1	6	control	0	0	0	0	0	0	0	0	1	1	1	1	1	1	1
Domesticated	1	7	control	0	0	0	0	0	0	0	0	1	1	1	1	1	1	1
Domesticated	1	8	control	0	0	0	0	0	0	0	0	1	1	1	1	1	1	1
Domesticated	1	9	control	0	0	0	0	0	0	0	0	1	1	1	1	1	1	1
Domesticated	1	10	control	0	0	0	0	0	0	0	0	0	0	0	0	0	0	0
Domesticated	2	1	control	0	0	0	0	0	0	0	0	1	1	1	1	1	1	1
Domesticated	2	2	control	0	0	0	0	0	0	0	0	1	1	1	1	1	1	1
Domesticated	2	3	control	0	0	0	0	0	0	0	0	1	1	1	1	1	1	1
Domesticated	2	4	control	0	0	0	0	0	0	0	0	1	1	1	1	1	1	1
Domesticated	2	5	control	0	0	0	0	0	0	0	0	1	1	1	1	1	1	1
Domesticated	2	6	control	0	0	0	0	0	0	0	0	1	1	1	1	1	1	1
Domesticated	2	7	control	0	0	0	0	0	0	0	0	1	1	1	1	1	1	1
Domesticated	2	8	control	0	0	0	0	0	0	0	0	1	1	1	1	1	1	1
Domesticated	2	9	control	0	0	0	0	0	0	0	0	0	0	0	0	0	0	0
Domesticated	2	10	control	0	0	0	0	0	0	0	0	0	0	0	0	0	0	0
Domesticated	3	1	control	0	0	0	0	0	0	0	0	1	1	1	1	1	1	1
Domesticated	3	2	control	0	0	0	0	0	0	0	0	1	1	1	1	1	1	1
Domesticated	3	3	control	0	0	0	0	0	0	0	0	1	1	1	1	1	1	1
Domesticated	3	4	control	0	0	0	0	0	0	0	0	1	1	1	1	1	1	1
Domesticated	3	5	control	0	0	0	0	0	0	0	0	1	1	1	1	1	1	1
Domesticated	3	6	control	0	0	0	0	0	0	0	0	1	1	1	1	1	1	1
Domesticated	3	7	control	0	0	0	0	0	0	0	0	0	1	1	1	1	1	1
Domesticated	3	8	control	0	0	0	0	0	0	0	0	0	0	0	0	0	0	0
Domesticated	3	9	control	0	0	0	0	0	0	0	0	0	0	0	0	0	0	0
Domesticated	3	10	control	0	0	0	0	0	0	0	0	0	0	0	0	0	0	0
Domesticated	4	1	control	0	0	0	0	0	0	0	0	1	1	1	1	1	1	1
Domesticated	4	2	control	0	0	0	0	0	0	0	0	1	1	1	1	1	1	1
Domesticated	4	3	control	0	0	0	0	0	0	0	0	1	1	1	1	1	1	1
Domesticated	4	4	control	0	0	0	0	0	0	0	0	1	1	1	1	1	1	1
Domesticated	4	5	control	0	0	0	0	0	0	0	0	1	1	1	1	1	1	1
Domesticated	4	6	control	0	0	0	0	0	0	0	0	1	1	1	1	1	1	1
Domesticated	4	7	control	0	0	0	0	0	0	0	0	1	1	1	1	1	1	1
Domesticated	4	8	control	0	0	0	0	0	0	0	0	0	0	0	0	0	0	0
Domesticated	4	9	control	0	0	0	0	0	0	0	0	0	0	0	0	0	0	0
Domesticated	4	10	control	0	0	0	0	0	0	0	0	0	0	0	0	0	0	0
Domesticated	5	1	control	0	0	0	0	0	0	0	0	1	1	1	1	1	1	1
Domesticated	5	2	control	0	0	0	0	0	0	0	0	1	1	1	1	1	1	1
Domesticated	5	3	control	0	0	0	0	0	0	0	0	1	1	1	1	1	1	1
Domesticated	5	4	control	0	0	0	0	0	0	0	0	1	1	1	1	1	1	1
Domesticated	5	5	control	0	0	0	0	0	0	0	0	1	1	1	1	1	1	1
Domesticated	5	6	control	0	0	0	0	0	0	0	0	1	1	1	1	1	1	1
Domesticated	5	7	control	0	0	0	0	0	0	0	0	0	1	1	1	1	1	1
Domesticated	5	8	control	0	0	0	0	0	0	0	0	0	0	0	1	1	1	1
Domesticated	5	9	control	0	0	0	0	0	0	0	0	0	0	0	0	0	0	0
Domesticated	5	10	control	0	0	0	0	0	0	0	0	0	0	0	0	0	0	0
Wildtype	1	1	250	0	0	0	0	0	0	0	0	0	0	1	1	1	1	1
Wildtype	1	2	250	0	0	0	0	0	0	0	0	0	0	0	1	1	1	1
Wildtype	1	3	250	0	0	0	0	0	0	0	0	0	0	0	1	1	1	1
Wildtype	1	4	250	0	0	0	0	0	0	0	0	0	0	0	1	1	1	1
Wildtype	1	5	250	0	0	0	0	0	0	0	0	0	0	0	1	1	1	1
Wildtype	1	6	250	0	0	0	0	0	0	0	0	0	0	0	0	1	1	1
Wildtype	1	7	250	0	0	0	0	0	0	0	0	0	0	0	0	1	1	1
Wildtype	1	8	250	0	0	0	0	0	0	0	0	0	0	0	0	1	1	1
Wildtype	1	9	250	0	0	0	0	0	0	0	0	0	0	0	0	1	1	1
Wildtype	1	10	250	0	0	0	0	0	0	0	0	0	0	0	0	0	1	1
Wildtype	2	1	250	0	0	0	0	0	0	0	0	0	0	1	1	1	1	1
Wildtype	2	2	250	0	0	0	0	0	0	0	0	0	0	1	1	1	1	1
Wildtype	2	3	250	0	0	0	0	0	0	0	0	0	0	0	0	1	1	1
Wildtype	2	4	250	0	0	0	0	0	0	0	0	0	0	0	0	1	1	1
Wildtype	2	5	250	0	0	0	0	0	0	0	0	0	0	0	0	0	1	1
Wildtype	2	6	250	0	0	0	0	0	0	0	0	0	0	0	0	0	1	1
Wildtype	2	7	250	0	0	0	0	0	0	0	0	0	0	0	0	0	1	1
Wildtype	2	8	250	0	0	0	0	0	0	0	0	0	0	0	0	0	1	1
Wildtype	2	9	250	0	0	0	0	0	0	0	0	0	0	0	0	0	1	1
Wildtype	2	10	250	0	0	0	0	0	0	0	0	0	0	0	0	0	0	0
Wildtype	3	1	250	0	0	0	0	0	0	0	0	0	0	1	1	1	1	1
Wildtype	3	2	250	0	0	0	0	0	0	0	0	0	0	0	1	1	1	1
Wildtype	3	3	250	0	0	0	0	0	0	0	0	0	0	0	1	1	1	1
Wildtype	3	4	250	0	0	0	0	0	0	0	0	0	0	0	1	1	1	1
Wildtype	3	5	250	0	0	0	0	0	0	0	0	0	0	0	1	1	1	1
Wildtype	3	6	250	0	0	0	0	0	0	0	0	0	0	0	0	1	1	1
Wildtype	3	7	250	0	0	0	0	0	0	0	0	0	0	0	0	1	1	1
Wildtype	3	8	250	0	0	0	0	0	0	0	0	0	0	0	0	1	1	1
Wildtype	3	9	250	0	0	0	0	0	0	0	0	0	0	0	0	1	1	1
Wildtype	3	10	250	0	0	0	0	0	0	0	0	0	0	0	0	1	1	1
Wildtype	4	1	250	0	0	0	0	0	0	0	0	0	1	1	1	1	1	1
Wildtype	4	2	250	0	0	0	0	0	0	0	0	0	0	1	1	1	1	1
Wildtype	4	3	250	0	0	0	0	0	0	0	0	0	0	1	1	1	1	1
Wildtype	4	4	250	0	0	0	0	0	0	0	0	0	0	0	1	1	1	1
Wildtype	4	5	250	0	0	0	0	0	0	0	0	0	0	0	1	1	1	1
Wildtype	4	6	250	0	0	0	0	0	0	0	0	0	0	0	0	1	1	1
Wildtype	4	7	250	0	0	0	0	0	0	0	0	0	0	0	0	1	1	1
Wildtype	4	8	250	0	0	0	0	0	0	0	0	0	0	0	0	1	1	1
Wildtype	4	9	250	0	0	0	0	0	0	0	0	0	0	0	0	1	1	1
Wildtype	4	10	250	0	0	0	0	0	0	0	0	0	0	0	0	0	0	0
Wildtype	5	1	250	0	0	0	0	0	0	0	0	0	1	1	1	1	1	1
Wildtype	5	2	250	0	0	0	0	0	0	0	0	0	0	0	1	1	1	1
Wildtype	5	3	250	0	0	0	0	0	0	0	0	0	0	0	1	1	1	1
Wildtype	5	4	250	0	0	0	0	0	0	0	0	0	0	0	0	1	1	1
Wildtype	5	5	250	0	0	0	0	0	0	0	0	0	0	0	0	1	1	1
Wildtype	5	6	250	0	0	0	0	0	0	0	0	0	0	0	0	1	1	1
Wildtype	5	7	250	0	0	0	0	0	0	0	0	0	0	0	0	1	1	1
Wildtype	5	8	250	0	0	0	0	0	0	0	0	0	0	0	0	1	1	1
Wildtype	5	9	250	0	0	0	0	0	0	0	0	0	0	0	0	0	1	1
Wildtype	5	10	250	0	0	0	0	0	0	0	0	0	0	0	0	0	1	1
Wildtype	1	1	100	0	0	0	0	0	0	0	0	1	1	1	1	1	1	1
Wildtype	1	2	100	0	0	0	0	0	0	0	0	0	0	0	1	1	1	1
Wildtype	1	3	100	0	0	0	0	0	0	0	0	0	0	0	0	1	1	1
Wildtype	1	4	100	0	0	0	0	0	0	0	0	0	0	0	0	1	1	1
Wildtype	1	5	100	0	0	0	0	0	0	0	0	0	0	0	0	1	1	1
Wildtype	1	6	100	0	0	0	0	0	0	0	0	0	0	0	0	1	1	1
Wildtype	1	7	100	0	0	0	0	0	0	0	0	0	0	0	0	1	1	1
Wildtype	1	8	100	0	0	0	0	0	0	0	0	0	0	0	0	1	1	1
Wildtype	1	9	100	0	0	0	0	0	0	0	0	0	0	0	0	1	1	1
Wildtype	1	10	100	0	0	0	0	0	0	0	0	0	0	0	0	0	1	1
Wildtype	2	1	100	0	0	0	0	0	0	0	0	0	0	1	1	1	1	1
Wildtype	2	2	100	0	0	0	0	0	0	0	0	0	0	1	1	1	1	1
Wildtype	2	3	100	0	0	0	0	0	0	0	0	0	0	0	1	1	1	1
Wildtype	2	4	100	0	0	0	0	0	0	0	0	0	0	0	1	1	1	1
Wildtype	2	5	100	0	0	0	0	0	0	0	0	0	0	0	1	1	1	1
Wildtype	2	6	100	0	0	0	0	0	0	0	0	0	0	0	1	1	1	1
Wildtype	2	7	100	0	0	0	0	0	0	0	0	0	0	0	0	1	1	1
Wildtype	2	8	100	0	0	0	0	0	0	0	0	0	0	0	0	1	1	1
Wildtype	2	9	100	0	0	0	0	0	0	0	0	0	0	0	0	1	1	1
Wildtype	2	10	100	0	0	0	0	0	0	0	0	0	0	0	0	1	1	1
Wildtype	3	1	100	0	0	0	0	0	0	0	0	0	0	0	1	1	1	1
Wildtype	3	2	100	0	0	0	0	0	0	0	0	0	0	0	1	1	1	1
Wildtype	3	3	100	0	0	0	0	0	0	0	0	0	0	0	1	1	1	1
Wildtype	3	4	100	0	0	0	0	0	0	0	0	0	0	0	1	1	1	1
Wildtype	3	5	100	0	0	0	0	0	0	0	0	0	0	0	1	1	1	1
Wildtype	3	6	100	0	0	0	0	0	0	0	0	0	0	0	1	1	1	1
Wildtype	3	7	100	0	0	0	0	0	0	0	0	0	0	0	1	1	1	1
Wildtype	3	8	100	0	0	0	0	0	0	0	0	0	0	0	0	1	1	1
Wildtype	3	9	100	0	0	0	0	0	0	0	0	0	0	0	0	1	1	1
Wildtype	3	10	100	0	0	0	0	0	0	0	0	0	0	0	0	1	1	1
Wildtype	4	1	100	0	0	0	0	0	0	0	0	0	1	1	1	1	1	1
Wildtype	4	2	100	0	0	0	0	0	0	0	0	0	0	1	1	1	1	1
Wildtype	4	3	100	0	0	0	0	0	0	0	0	0	0	1	1	1	1	1
Wildtype	4	4	100	0	0	0	0	0	0	0	0	0	0	1	1	1	1	1
Wildtype	4	5	100	0	0	0	0	0	0	0	0	0	0	1	1	1	1	1
Wildtype	4	6	100	0	0	0	0	0	0	0	0	0	0	0	1	1	1	1
Wildtype	4	7	100	0	0	0	0	0	0	0	0	0	0	0	0	1	1	1
Wildtype	4	8	100	0	0	0	0	0	0	0	0	0	0	0	0	0	1	1
Wildtype	4	9	100	0	0	0	0	0	0	0	0	0	0	0	0	0	1	1
Wildtype	4	10	100	0	0	0	0	0	0	0	0	0	0	0	0	0	0	0
Wildtype	5	1	100	0	0	0	0	0	0	0	0	0	1	1	1	1	1	1
Wildtype	5	2	100	0	0	0	0	0	0	0	0	0	1	1	1	1	1	1
Wildtype	5	3	100	0	0	0	0	0	0	0	0	0	1	1	1	1	1	1
Wildtype	5	4	100	0	0	0	0	0	0	0	0	0	0	1	1	1	1	1
Wildtype	5	5	100	0	0	0	0	0	0	0	0	0	0	1	1	1	1	1
Wildtype	5	6	100	0	0	0	0	0	0	0	0	0	0	1	1	1	1	1
Wildtype	5	7	100	0	0	0	0	0	0	0	0	0	0	0	0	0	1	1
Wildtype	5	8	100	0	0	0	0	0	0	0	0	0	0	0	0	0	1	1
Wildtype	5	9	100	0	0	0	0	0	0	0	0	0	0	0	0	0	1	1
Wildtype	5	10	100	0	0	0	0	0	0	0	0	0	0	0	0	0	0	0
Wildtype	1	1	50	0	0	0	0	0	0	0	0	1	1	1	1	1	1	1
Wildtype	1	2	50	0	0	0	0	0	0	0	0	1	1	1	1	1	1	1
Wildtype	1	3	50	0	0	0	0	0	0	0	0	0	1	1	1	1	1	1
Wildtype	1	4	50	0	0	0	0	0	0	0	0	0	1	1	1	1	1	1
Wildtype	1	5	50	0	0	0	0	0	0	0	0	0	1	1	1	1	1	1
Wildtype	1	6	50	0	0	0	0	0	0	0	0	0	1	1	1	1	1	1
Wildtype	1	7	50	0	0	0	0	0	0	0	0	0	1	1	1	1	1	1
Wildtype	1	8	50	0	0	0	0	0	0	0	0	0	0	1	1	1	1	1
Wildtype	1	9	50	0	0	0	0	0	0	0	0	0	0	1	1	1	1	1
Wildtype	1	10	50	0	0	0	0	0	0	0	0	0	0	0	0	0	0	1
Wildtype	2	1	50	0	0	0	0	0	0	0	0	1	1	1	1	1	1	1
Wildtype	2	2	50	0	0	0	0	0	0	0	0	0	1	1	1	1	1	1
Wildtype	2	3	50	0	0	0	0	0	0	0	0	0	0	1	1	1	1	1
Wildtype	2	4	50	0	0	0	0	0	0	0	0	0	0	0	1	1	1	1
Wildtype	2	5	50	0	0	0	0	0	0	0	0	0	0	0	0	1	1	1
Wildtype	2	6	50	0	0	0	0	0	0	0	0	0	0	0	0	0	0	1
Wildtype	2	7	50	0	0	0	0	0	0	0	0	0	0	0	0	0	0	0
Wildtype	2	8	50	0	0	0	0	0	0	0	0	0	0	0	0	0	0	0
Wildtype	2	9	50	0	0	0	0	0	0	0	0	0	0	0	0	0	0	0
Wildtype	2	10	50	0	0	0	0	0	0	0	0	0	0	0	0	0	0	0
Wildtype	3	1	50	0	0	0	0	0	0	0	0	0	0	0	1	1	1	1
Wildtype	3	2	50	0	0	0	0	0	0	0	0	0	0	0	1	1	1	1
Wildtype	3	3	50	0	0	0	0	0	0	0	0	0	0	0	1	1	1	1
Wildtype	3	4	50	0	0	0	0	0	0	0	0	0	0	0	0	1	1	1
Wildtype	3	5	50	0	0	0	0	0	0	0	0	0	0	0	0	1	1	1
Wildtype	3	6	50	0	0	0	0	0	0	0	0	0	0	0	0	1	1	1
Wildtype	3	7	50	0	0	0	0	0	0	0	0	0	0	0	0	1	1	1
Wildtype	3	8	50	0	0	0	0	0	0	0	0	0	0	0	0	1	1	1
Wildtype	3	9	50	0	0	0	0	0	0	0	0	0	0	0	0	1	1	1
Wildtype	3	10	50	0	0	0	0	0	0	0	0	0	0	0	0	0	0	0
Wildtype	4	1	50	0	0	0	0	0	0	0	0	0	0	1	1	1	1	1
Wildtype	4	2	50	0	0	0	0	0	0	0	0	0	0	0	1	1	1	1
Wildtype	4	3	50	0	0	0	0	0	0	0	0	0	0	0	1	1	1	1
Wildtype	4	4	50	0	0	0	0	0	0	0	0	0	0	0	0	1	1	1
Wildtype	4	5	50	0	0	0	0	0	0	0	0	0	0	0	0	1	1	1
Wildtype	4	6	50	0	0	0	0	0	0	0	0	0	0	0	0	1	1	1
Wildtype	4	7	50	0	0	0	0	0	0	0	0	0	0	0	0	1	1	1
Wildtype	4	8	50	0	0	0	0	0	0	0	0	0	0	0	0	1	1	1
Wildtype	4	9	50	0	0	0	0	0	0	0	0	0	0	0	0	0	0	0
Wildtype	4	10	50	0	0	0	0	0	0	0	0	0	0	0	0	0	0	0
Wildtype	5	1	50	0	0	0	0	0	0	0	0	0	1	1	1	1	1	1
Wildtype	5	2	50	0	0	0	0	0	0	0	0	0	0	1	1	1	1	1
Wildtype	5	3	50	0	0	0	0	0	0	0	0	0	0	1	1	1	1	1
Wildtype	5	4	50	0	0	0	0	0	0	0	0	0	0	0	0	1	1	1
Wildtype	5	5	50	0	0	0	0	0	0	0	0	0	0	0	0	1	1	1
Wildtype	5	6	50	0	0	0	0	0	0	0	0	0	0	0	0	0	1	1
Wildtype	5	7	50	0	0	0	0	0	0	0	0	0	0	0	0	0	0	0
Wildtype	5	8	50	0	0	0	0	0	0	0	0	0	0	0	0	0	0	0
Wildtype	5	9	50	0	0	0	0	0	0	0	0	0	0	0	0	0	0	0
Wildtype	5	10	50	0	0	0	0	0	0	0	0	0	0	0	0	0	0	0
Wildtype	1	1	control	0	0	0	0	0	0	0	0	1	1	1	1	1	1	1
Wildtype	1	2	control	0	0	0	0	0	0	0	0	1	1	1	1	1	1	1
Wildtype	1	3	control	0	0	0	0	0	0	0	0	1	1	1	1	1	1	1
Wildtype	1	4	control	0	0	0	0	0	0	0	0	1	1	1	1	1	1	1
Wildtype	1	5	control	0	0	0	0	0	0	0	0	0	1	1	1	1	1	1
Wildtype	1	6	control	0	0	0	0	0	0	0	0	0	0	0	0	0	1	1
Wildtype	1	7	control	0	0	0	0	0	0	0	0	0	0	0	0	0	0	0
Wildtype	1	8	control	0	0	0	0	0	0	0	0	0	0	0	0	0	0	0
Wildtype	1	9	control	0	0	0	0	0	0	0	0	0	0	0	0	0	0	0
Wildtype	1	10	control	0	0	0	0	0	0	0	0	0	0	0	0	0	0	0
Wildtype	2	1	control	0	0	0	0	0	0	0	0	0	0	1	1	1	1	1
Wildtype	2	2	control	0	0	0	0	0	0	0	0	0	0	1	1	1	1	1
Wildtype	2	3	control	0	0	0	0	0	0	0	0	0	0	1	1	1	1	1
Wildtype	2	4	control	0	0	0	0	0	0	0	0	0	0	0	1	1	1	1
Wildtype	2	5	control	0	0	0	0	0	0	0	0	0	0	0	1	1	1	1
Wildtype	2	6	control	0	0	0	0	0	0	0	0	0	0	0	1	1	1	1
Wildtype	2	7	control	0	0	0	0	0	0	0	0	0	0	0	0	1	1	1
Wildtype	2	8	control	0	0	0	0	0	0	0	0	0	0	0	0	1	1	1
Wildtype	2	9	control	0	0	0	0	0	0	0	0	0	0	0	0	1	1	1
Wildtype	2	10	control	0	0	0	0	0	0	0	0	0	0	0	0	1	1	1
Wildtype	3	1	control	0	0	0	0	0	0	0	0	0	0	0	1	1	1	1
Wildtype	3	2	control	0	0	0	0	0	0	0	0	0	0	0	1	1	1	1
Wildtype	3	3	control	0	0	0	0	0	0	0	0	0	0	0	0	1	1	1
Wildtype	3	4	control	0	0	0	0	0	0	0	0	0	0	0	0	1	1	1
Wildtype	3	5	control	0	0	0	0	0	0	0	0	0	0	0	0	0	1	1
Wildtype	3	6	control	0	0	0	0	0	0	0	0	0	0	0	0	0	1	1
Wildtype	3	7	control	0	0	0	0	0	0	0	0	0	0	0	0	0	0	1
Wildtype	3	8	control	0	0	0	0	0	0	0	0	0	0	0	0	0	0	0
Wildtype	3	9	control	0	0	0	0	0	0	0	0	0	0	0	0	0	0	0
Wildtype	3	10	control	0	0	0	0	0	0	0	0	0	0	0	0	0	0	0
Wildtype	4	1	control	0	0	0	0	0	0	0	0	0	0	0	1	1	1	1
Wildtype	4	2	control	0	0	0	0	0	0	0	0	0	0	0	0	1	1	1
Wildtype	4	3	control	0	0	0	0	0	0	0	0	0	0	0	0	1	1	1
Wildtype	4	4	control	0	0	0	0	0	0	0	0	0	0	0	0	1	1	1
Wildtype	4	5	control	0	0	0	0	0	0	0	0	0	0	0	0	0	1	1
Wildtype	4	6	control	0	0	0	0	0	0	0	0	0	0	0	0	0	1	1
Wildtype	4	7	control	0	0	0	0	0	0	0	0	0	0	0	0	0	0	0
Wildtype	4	8	control	0	0	0	0	0	0	0	0	0	0	0	0	0	0	0
Wildtype	4	9	control	0	0	0	0	0	0	0	0	0	0	0	0	0	0	0
Wildtype	4	10	control	0	0	0	0	0	0	0	0	0	0	0	0	0	0	0
Wildtype	5	1	control	0	0	0	0	0	0	0	0	0	1	1	1	1	1	1
Wildtype	5	2	control	0	0	0	0	0	0	0	0	0	1	1	1	1	1	1
Wildtype	5	3	control	0	0	0	0	0	0	0	0	0	1	1	1	1	1	1
Wildtype	5	4	control	0	0	0	0	0	0	0	0	0	1	1	1	1	1	1
Wildtype	5	5	control	0	0	0	0	0	0	0	0	0	1	1	1	1	1	1
Wildtype	5	6	control	0	0	0	0	0	0	0	0	0	1	1	1	1	1	1
Wildtype	5	7	control	0	0	0	0	0	0	0	0	0	1	1	1	1	1	1
Wildtype	5	8	control	0	0	0	0	0	0	0	0	0	0	0	1	1	1	1
Wildtype	5	9	control	0	0	0	0	0	0	0	0	0	0	0	0	0	0	1
Wildtype	5	10	control	0	0	0	0	0	0	0	0	0	0	0	0	0	0	0

## Sheet: Hoja 2
Day	AgNP Treatment (ppm)	Censor
8	250	1
8	250	0
8	250	0
8	250	0
8	250	0
8	250	0
8	250	0
8	250	0
8	250	0
8	250	0
8	250	1
8	250	0
8	250	0
8	250	0
8	250	0
8	250	0
8	250	0
8	250	0
8	250	0
8	250	0
8	250	0
8	250	0
8	250	0
8	250	0
8	250	0
8	250	0
8	250	0
8	250	0
8	250	0
8	250	0
8	250	0
8	250	0
8	250	0
8	250	0
8	250	0
8	250	0
8	250	0
8	250	0
8	250	0
8	250	0
8	250	0
8	250	0
8	250	0
8	250	0
8	250	0
8	250	0
8	250	0
8	250	0
8	250	0
8	250	0
8	100	1
8	100	0
8	100	0
8	100	0
8	100	0
8	100	0
8	100	0
8	100	0
8	100	0
8	100	0
8	100	1
8	100	0
8	100	0
8	100	0
8	100	0
8	100	0
8	100	0
8	100	0
8	100	0
8	100	0
8	100	1
8	100	1
8	100	1
8	100	1
8	100	1
8	100	0
8	100	0
8	100	0
8	100	0
8	100	0
8	100	1
8	100	1
8	100	0
8	100	0
8	100	0
8	100	0
8	100	0
8	100	0
8	100	0
8	100	0
8	100	1
8	100	1
8	100	1
8	100	1
8	100	1
8	100	0
8	100	0
8	100	0
8	100	0
8	100	0
8	50	1
8	50	1
8	50	1
8	50	0
8	50	0
8	50	0
8	50	0
8	50	0
8	50	0
8	50	0
8	50	1
8	50	1
8	50	1
8	50	0
8	50	0
8	50	0
8	50	0
8	50	0
8	50	0
8	50	0
8	50	1
8	50	0
8	50	0
8	50	0
8	50	0
8	50	0
8	50	0
8	50	0
8	50	0
8	50	0
8	50	1
8	50	1
8	50	1
8	50	0
8	50	0
8	50	0
8	50	0
8	50	0
8	50	0
8	50	0
8	50	1
8	50	1
8	50	1
8	50	1
8	50	1
8	50	0
8	50	0
8	50	0
8	50	0
8	50	0
8	0	1
8	0	1
8	0	1
8	0	1
8	0	1
8	0	1
8	0	1
8	0	1
8	0	1
8	0	0
8	0	1
8	0	1
8	0	1
8	0	1
8	0	1
8	0	1
8	0	1
8	0	1
8	0	0
8	0	0
8	0	1
8	0	1
8	0	1
8	0	1
8	0	1
8	0	1
8	0	0
8	0	0
8	0	0
8	0	0
8	0	1
8	0	1
8	0	1
8	0	1
8	0	1
8	0	1
8	0	1
8	0	0
8	0	0
8	0	0
8	0	1
8	0	1
8	0	1
8	0	1
8	0	1
8	0	1
8	0	0
8	0	0
8	0	0
8	0	0
9	250	1
9	250	1
9	250	1
9	250	1
9	250	1
9	250	1
9	250	1
9	250	0
9	250	0
9	250	0
9	250	1
9	250	1
9	250	1
9	250	1
9	250	1
9	250	1
9	250	1
9	250	0
9	250	0
9	250	0
9	250	1
9	250	0
9	250	0
9	250	0
9	250	0
9	250	0
9	250	0
9	250	0
9	250	0
9	250	0
9	250	1
9	250	1
9	250	1
9	250	0
9	250	0
9	250	0
9	250	0
9	250	0
9	250	0
9	250	0
9	250	1
9	250	1
9	250	1
9	250	1
9	250	1
9	250	0
9	250	0
9	250	0
9	250	0
9	250	0
9	100	1
9	100	1
9	100	1
9	100	1
9	100	1
9	100	1
9	100	1
9	100	0
9	100	0
9	100	0
9	100	1
9	100	1
9	100	1
9	100	1
9	100	1
9	100	1
9	100	1
9	100	0
9	100	0
9	100	0
9	100	1
9	100	1
9	100	1
9	100	1
9	100	1
9	100	1
9	100	1
9	100	1
9	100	1
9	100	0
9	100	1
9	100	1
9	100	1
9	100	1
9	100	1
9	100	1
9	100	1
9	100	1
9	100	0
9	100	0
9	100	1
9	100	1
9	100	1
9	100	1
9	100	1
9	100	1
9	100	1
9	100	0
9	100	0
9	100	0
9	50	1
9	50	1
9	50	1
9	50	1
9	50	1
9	50	1
9	50	1
9	50	0
9	50	0
9	50	0
9	50	1
9	50	1
9	50	1
9	50	1
9	50	1
9	50	0
9	50	0
9	50	0
9	50	0
9	50	0
9	50	1
9	50	1
9	50	1
9	50	1
9	50	1
9	50	1
9	50	0
9	50	0
9	50	0
9	50	0
9	50	1
9	50	1
9	50	1
9	50	1
9	50	1
9	50	1
9	50	1
9	50	0
9	50	0
9	50	0
9	50	1
9	50	1
9	50	1
9	50	1
9	50	1
9	50	1
9	50	1
9	50	1
9	50	0
9	50	0
9	0	1
9	0	1
9	0	1
9	0	1
9	0	1
9	0	1
9	0	1
9	0	1
9	0	1
9	0	0
9	0	1
9	0	1
9	0	1
9	0	1
9	0	1
9	0	1
9	0	1
9	0	1
9	0	0
9	0	0
9	0	1
9	0	1
9	0	1
9	0	1
9	0	1
9	0	1
9	0	1
9	0	0
9	0	0
9	0	0
9	0	1
9	0	1
9	0	1
9	0	1
9	0	1
9	0	1
9	0	1
9	0	0
9	0	0
9	0	0
9	0	1
9	0	1
9	0	1
9	0	1
9	0	1
9	0	1
9	0	1
9	0	0
9	0	0
9	0	0
10	250	1
10	250	1
10	250	1
10	250	1
10	250	1
10	250	1
10	250	1
10	250	1
10	250	1
10	250	0
10	250	1
10	250	1
10	250	1
10	250	1
10	250	1
10	250	1
10	250	1
10	250	1
10	250	0
10	250	0
10	250	1
10	250	1
10	250	0
10	250	0
10	250	0
10	250	0
10	250	0
10	250	0
10	250	0
10	250	0
10	250	1
10	250	1
10	250	1
10	250	1
10	250	1
10	250	1
10	250	1
10	250	1
10	250	1
10	250	0
10	250	1
10	250	1
10	250	1
10	250	1
10	250	1
10	250	1
10	250	1
10	250	1
10	250	0
10	250	0
10	100	1
10	100	1
10	100	1
10	100	1
10	100	1
10	100	1
10	100	1
10	100	0
10	100	0
10	100	0
10	100	1
10	100	1
10	100	1
10	100	1
10	100	1
10	100	1
10	100	1
10	100	0
10	100	0
10	100	0
10	100	1
10	100	1
10	100	1
10	100	1
10	100	1
10	100	1
10	100	1
10	100	1
10	100	1
10	100	0
10	100	1
10	100	1
10	100	1
10	100	1
10	100	1
10	100	1
10	100	1
10	100	1
10	100	0
10	100	0
10	100	1
10	100	1
10	100	1
10	100	1
10	100	1
10	100	1
10	100	1
10	100	1
10	100	1
10	100	0
10	50	1
10	50	1
10	50	1
10	50	1
10	50	1
10	50	1
10	50	1
10	50	1
10	50	1
10	50	0
10	50	1
10	50	1
10	50	1
10	50	1
10	50	1
10	50	0
10	50	0
10	50	0
10	50	0
10	50	0
10	50	1
10	50	1
10	50	1
10	50	1
10	50	1
10	50	1
10	50	1
10	50	1
10	50	1
10	50	1
10	50	1
10	50	1
10	50	1
10	50	1
10	50	1
10	50	1
10	50	1
10	50	1
10	50	0
10	50	0
10	50	1
10	50	1
10	50	1
10	50	1
10	50	1
10	50	1
10	50	1
10	50	1
10	50	0
10	50	0
10	0	1
10	0	1
10	0	1
10	0	1
10	0	1
10	0	1
10	0	1
10	0	1
10	0	1
10	0	0
10	0	1
10	0	1
10	0	1
10	0	1
10	0	1
10	0	1
10	0	1
10	0	1
10	0	0
10	0	0
10	0	1
10	0	1
10	0	1
10	0	1
10	0	1
10	0	1
10	0	1
10	0	0
10	0	0
10	0	0
10	0	1
10	0	1
10	0	1
10	0	1
10	0	1
10	0	1
10	0	1
10	0	0
10	0	0
10	0	0
10	0	1
10	0	1
10	0	1
10	0	1
10	0	1
10	0	1
10	0	1
10	0	0
10	0	0
10	0	0
