# Supplementary material for: Beneficial dose-dependent effects of Ag nanoparticles on germination do not compromise growth and metabolic profiles of Capsicum annuum seedlings
Source: PeerJ. 2025 Sep 9;13:e19974. doi: 10.7717/peerj.19974 (PMC12428529; doi:10.7717/peerj.19974)
Supplement: Supplemental Information 13 — In the plant type column, domesticated refers to Serrano and wildtype refers to Chiltepin. In the treatment column, control means that no nanoparticles are present, meaning only distilled water was used. The ID indicates the individual plant number. [file peerj-13-19974-s013.xlsx]

## Sheet: Hoja 1
Plant type	AgNP Treatment (ppm)	ID	Root length (cm) 0 h	Root length (cm) 24h	Root length (cm) 48h	Root length (cm) 72h	Shoot length (cm) 0 h	Shoot length (cm) 24h	Shoot length (cm) 48h	Shoot length (cm) 72h	Prophase (number of cells)	Metaphase (number of cells)	Anaphase (number of cells)	Telophase (number of cells)	Interphase (number of cells)	Total number of cells
Domesticated	5	1	13.824	14.155	14.361	16.453	8.209	8.649	8.862	9.322	5	6	14	9	466	500
Domesticated	5	2	13.594	14.157	14.462	14.502	7.56	7.994	8.039	8.271	5	4	10	2	679	700
Domesticated	5	3	13.822	14.153	14.333	15.138	7.655	7.711	7.825	8.514	4	8	0	3	485	500
Domesticated	5	4	29.115	29.782	30.209	30.725	7.393	8.018	8.282	8.499	7	3	8	4	978	1000
Domesticated	5	5	18.689	18.781	19.364	19.825	7.428	7.487	7.689	8.101	6	9	6	5	474	500
Domesticated	Control	1	13.912	14.706	15.38	16.211	6.599	7.052	7.382	7.502	5	10	4	6	475	500
Domesticated	Control	2	19.669	20.248	21.238	23.335	6.539	6.729	7.356	7.289	5	9	3	7	676	700
Domesticated	Control	3	17.76	19.021	19.979	20.641	7.534	8.016	8.049	8.195	13	8	6	9	464	500
Domesticated	Control	4	17.973	18.983	19.941	19.982	7.609	7.864	8.132	8.387	7	27	21	17	728	800
Domesticated	Control	5	18.605	19.392	20.265	20.478	6.647	7.155	7.281	7.811	12	12	8	13	955	1000
Wildtype	5	1	9.327	9.513	9.756	9.77	4.475	4.544	4.572	4.779	7	9	9	6	469	500
Wildtype	5	2	8.777	9.083	9.364	9.95	3.777	3.799	3.94	3.97	3	11	9	5	872	900
Wildtype	5	3	9.971	9.971	10.108	10.447	4.148	4.373	4.462	4.54	8	9	9	7	967	1000
Wildtype	5	4	11.778	11.807	11.941	12.471	4.482	4.633	4.73	4.947	4	6	10	8	672	700
Wildtype	5	5	5.981	6.414	6.618	6.697	4.019	4.215	4.359	4.727	5	8	8	12	867	900
Wildtype	Control	1	11.666	11.694	11.999	12.041	3.671	4.024	4.326	4.534	3	9	10	11	467	500
Wildtype	Control	2	18.155	18.292	18.639	18.931	4.767	4.841	4.98	5.008	3	8	13	4	672	700
Wildtype	Control	3	10.907	10.995	11.099	11.336	4.916	5.058	5.218	5.224	4	7	18	5	966	1000
Wildtype	Control	4	8.75	8.876	9.356	10.311	4.137	4.147	4.7	5.095	6	3	17	6	968	1000
Wildtype	Control	5	9.836	10.043	10.164	10.813	3.823	4.069	4.631	4.65	3	0	7	8	682	700
