# Supplementary material for: Beneficial dose-dependent effects of Ag nanoparticles on germination do not compromise growth and metabolic profiles of Capsicum annuum seedlings
Source: PeerJ. 2025 Sep 9;13:e19974. doi: 10.7717/peerj.19974 (PMC12428529; doi:10.7717/peerj.19974)
Supplement: Supplemental Information 14 — The first column refers to the chili variety used, comparing a domesticated variety (Serrano) and a wild variety (Chiltepin). The column titled ”ID” represents the specific number assigned to each plant. The chlorophyll content recorded in the last column is the average of three measurements taken from the same plant. The plants are 28 days old after germination. [file peerj-13-19974-s014.xlsx]

## Sheet: Chlorophyll
Plant type	AgNP Treatment (ppm)	ID	Chlorophyll Content index (CCI) mean
Domesticated	250	10	13.4
Domesticated	250	11	8.76667
Domesticated	250	12	15.0667
Domesticated	250	13	18.1
Domesticated	250	14	15.6333
Domesticated	250	15	17.0667
Domesticated	250	16	16.8333
Domesticated	250	17	18.5333
Domesticated	250	18	16.7667
Domesticated	250	19	12.2667
Domesticated	250	20	12.1
Domesticated	250	22	21
Domesticated	250	23	26.1
Domesticated	250	24	18.8
Domesticated	250	25	18.8
Domesticated	250	26	22.8
Domesticated	250	27	11.5333
Domesticated	250	28	17.3667
Domesticated	250	29	12.7
Domesticated	250	30	15.5
Domesticated	250	32	19.0667
Domesticated	250	34	16.4667
Domesticated	250	35	13.2667
Domesticated	250	36	18.0333
Domesticated	250	37	19.1333
Domesticated	250	39	16.8667
Domesticated	250	40	16.1333
Domesticated	250	41	10.8
Domesticated	100	10	15.2333
Domesticated	100	11	13.7333
Domesticated	100	12	14.4
Domesticated	100	13	16.9333
Domesticated	100	14	16.2333
Domesticated	100	15	19.5667
Domesticated	100	16	15.4333
Domesticated	100	17	14.6
Domesticated	100	18	12.3333
Domesticated	100	19	18.8667
Domesticated	100	20	11.5667
Domesticated	100	21	17.0667
Domesticated	100	23	25.4667
Domesticated	100	24	16.9333
Domesticated	100	25	16
Domesticated	100	26	14.5
Domesticated	100	27	12.7333
Domesticated	100	29	16.1
Domesticated	100	30	15.5333
Domesticated	100	31	22.7667
Domesticated	100	32	21.2333
Domesticated	100	33	19.7333
Domesticated	100	34	15.2667
Domesticated	100	35	4.96667
Domesticated	100	36	20.9333
Domesticated	100	37	16.6333
Domesticated	100	38	18.8667
Domesticated	100	39	21.8
Domesticated	50	10	7.8
Domesticated	50	11	10.4333
Domesticated	50	12	11.2
Domesticated	50	14	8.2
Domesticated	50	15	14.8333
Domesticated	50	16	10.2667
Domesticated	50	17	15.4
Domesticated	50	18	11.7
Domesticated	50	19	14.3667
Domesticated	50	20	11.5333
Domesticated	50	21	13.4667
Domesticated	50	22	24.3
Domesticated	50	23	16.3333
Domesticated	50	24	20.5
Domesticated	50	26	15.3667
Domesticated	50	27	14.5
Domesticated	50	28	17.8
Domesticated	50	29	19.5
Domesticated	50	30	20.2333
Domesticated	50	31	23.8
Domesticated	50	32	8.03333
Domesticated	50	33	18.3333
Domesticated	50	34	15.1333
Domesticated	50	35	16.9
Domesticated	50	36	17.1333
Domesticated	50	37	11.5667
Domesticated	50	38	15.9667
Domesticated	50	39	19.8
Domesticated	50	40	15.3
Domesticated	Control	10	12.5
Domesticated	Control	11	15.8667
Domesticated	Control	12	5.9
Domesticated	Control	13	25.6333
Domesticated	Control	14	10.0333
Domesticated	Control	15	16.8333
Domesticated	Control	16	13.9
Domesticated	Control	17	9.5
Domesticated	Control	18	11.3333
Domesticated	Control	19	23.7333
Domesticated	Control	20	20.5
Domesticated	Control	21	11.4
Domesticated	Control	22	17.7667
Domesticated	Control	23	12.3
Domesticated	Control	24	15.3
Domesticated	Control	25	12.4667
Domesticated	Control	26	17.3333
Domesticated	Control	27	13.5
Domesticated	Control	28	19.9667
Domesticated	Control	29	19.6
Domesticated	Control	30	22.6333
Domesticated	Control	31	20.5
Domesticated	Control	32	20.3667
Domesticated	Control	33	23.8
Domesticated	Control	34	20.9667
Domesticated	Control	35	19.6667
Domesticated	Control	36	24.5667
Domesticated	Control	38	14.9
Wildtype	250	14	14.2667
Wildtype	250	15	12.2
Wildtype	250	16	12.3667
Wildtype	250	17	14.9
Wildtype	250	18	16.2333
Wildtype	250	19	5.43333
Wildtype	250	20	13.5667
Wildtype	250	23	9.93333
Wildtype	250	24	6.06667
Wildtype	250	25	14.3
Wildtype	250	29	11.8667
Wildtype	250	34	6.03333
Wildtype	250	37	14.6667
Wildtype	250	38	12.7333
Wildtype	250	39	9.83333
Wildtype	250	40	11.5333
Wildtype	100	12	13.5667
Wildtype	100	13	10.9667
Wildtype	100	14	16.3
Wildtype	100	15	18.9
Wildtype	100	16
Wildtype	100	17	14.1667
Wildtype	100	18	12.4333
Wildtype	100	19	7.6
Wildtype	100	20	12.9333
Wildtype	100	21	13.3333
Wildtype	100	22	8.93333
Wildtype	100	23	16.1333
Wildtype	100	24	17.9333
Wildtype	100	25	7.66667
Wildtype	100	26	13.3667
Wildtype	100	27	7.26667
Wildtype	100	32	12.2
Wildtype	100	35	15.0667
Wildtype	100	36	14.2
Wildtype	100	42	14.0667
Wildtype	50	10	11.4
Wildtype	50	12	11.0667
Wildtype	50	13	15.5
Wildtype	50	14	12.5
Wildtype	50	15	12.1667
Wildtype	50	16	14.4333
Wildtype	50	17	12.6667
Wildtype	50	18	18.9667
Wildtype	50	19	16.1667
Wildtype	50	20	18
Wildtype	50	22	7.2
Wildtype	50	23	7.03333
Wildtype	50	24	8.03333
Wildtype	50	25	17.9667
Wildtype	50	26	9.96667
Wildtype	50	33	9.86667
Wildtype	50	34	10.2667
Wildtype	50	35	11
Wildtype	Control	14	10.8
Wildtype	Control	15	14.1333
Wildtype	Control	16	14.3667
Wildtype	Control	17	17.5333
Wildtype	Control	18	16.7333
Wildtype	Control	19	15.5667
Wildtype	Control	20	15.0667
Wildtype	Control	21	18.2333
Wildtype	Control	22	17.1
