# Supplementary material for: Beneficial dose-dependent effects of Ag nanoparticles on germination do not compromise growth and metabolic profiles of Capsicum annuum seedlings
Source: PeerJ. 2025 Sep 9;13:e19974. doi: 10.7717/peerj.19974 (PMC12428529; doi:10.7717/peerj.19974)
Supplement: Supplemental Information 15 — The first column refers to the chili variety used, comparing a domesticated variety (Serrano) and a wild variety (Chiltepin). The column titled ”ID” represents the specific number assigned to each plant. The three columns titled ”CCI 1-3” indicate individual chlorophyll measurements per leaf. The chlorophyll index recorded in the last column is the average of three measurements taken from the same plant. The plants are 42 days old after germination. [file peerj-13-19974-s015.xlsx]

## Sheet: Second Chlorophyll_42 Days
Plant type	AgNP Treatment (ppm)	CCI 1	CCI 2	CCI 3	CCI Mean
Domesticated	250	8.7	11.1	12	10.6
Domesticated	50	11.7	17.5	35.6	21.6
Domesticated	100	18	32	33.4	27.8
Domesticated	Control	23.2	29.6	27.4	26.7333
Domesticated	250	19.6	27.9	28.7	25.4
Domesticated	Control	37.3	19.7	18.3	25.1
Domesticated	Control	31.4	35.4	37.5	34.7667
Domesticated	250	20.1	15.5	18.2	17.9333
Domesticated	Control	30.5	21.4	23.3	25.0667
Domesticated	100	37.5	34.5	32.4	34.8
Domesticated	Control	31.1	24	24.5	26.5333
Domesticated	50	21.6	19.8	20.9	20.7667
Domesticated	Control	27.1	29.6	33.3	30
Domesticated	Control	28.2	27.4	30.5	28.7
Domesticated	Control	22.4	28.3	16.7	22.4667
Domesticated	Control	24.1	27.2	26.7	26
Domesticated	Control	22.7	25.1	23.9	23.9
Domesticated	Control	35.3	35.4	29.5	33.4
Domesticated	Control	4.9	3.2	11.2	6.43333
Domesticated	Control	24.2	20.4	21.5	22.0333
Domesticated	Control	23.4	22.9	15.6	20.6333
Domesticated	Control	18.9	19.6	20.8	19.7667
Domesticated	Control	25.1	26.9	32.5	28.1667
Domesticated	100	25.1	26.2	27.6	26.3
Domesticated	50	23.9	32.5	34.4	30.2667
Domesticated	100	11.2	27.2	26.9	21.7667
Domesticated	250	27.2	28.9	31	29.0333
Domesticated	100	29.5	20.7	18.5	22.9
Domesticated	50	13.4	12.8	12.9	13.0333
Domesticated	250	40	31.5	34.9	35.4667
Domesticated	50	25.3	24.6	21	23.6333
Domesticated	250	21.5	19.2	27.2	22.6333
Domesticated	50	23.4	17.2	21.2	20.6
Domesticated	250	24.3	25.8	23.8	24.6333
Domesticated	50	15.9	11.9	15.3	14.3667
Domesticated	100	25.3	29.8	40.8	31.9667
Domesticated	50	20.7	20.8	21.1	20.8667
Domesticated	100	23.8	31	34.7	29.8333
Domesticated	50	17.3	16.2	20.6	18.0333
Domesticated	100	15.9	17.2	18.6	17.2333
Domesticated	50	19.1	23.3	24.4	22.2667
Domesticated	100	15.5	18.1	26.3	19.9667
Domesticated	Control	25.8	30	23.6	26.4667
Domesticated	Control	32.2	27.1	35.7	31.6667
Domesticated	Control	35	28	35.7	32.9
Domesticated	Control	34.6	18.7	34.7	29.3333
Domesticated	Control	19.5	36.2	23.7	26.4667
Domesticated	100	22.7	32.1	33	29.2667
Domesticated	250	25	27.6	19.7	24.1
Domesticated	50	20	18.8	17.9	18.9
Domesticated	50	20.8	19.4	23.2	21.1333
Domesticated	50	26.5	19.3	22.5	22.7667
Domesticated	250	12.9	25	20.4	19.4333
Domesticated	250	29.1	21.1	19.7	23.3
Domesticated	50	15.2	19.4	18.1	17.5667
Domesticated	50	21.4	31.5	35	29.3
Domesticated	250	36.1	33.6	45.6	38.4333
Domesticated	250	42.3	24.1	34.7	33.7
Domesticated	100	24.7	27.7	31.4	27.9333
Domesticated	250	17.4	17.1	29.4	21.3
Domesticated	250	30.6	31.5	26.2	29.4333
Domesticated	100	21.4	18.5	29.9	23.2667
Domesticated	250	13.7	23.4	20.9	19.3333
Domesticated	100	17.8	14.7	14.9	15.8
Domesticated	250	25.7	33.6	27.8	29.0333
Domesticated	250	21.9	16.9	20.8	19.8667
Domesticated	100	22.5	21.1	19.8	21.1333
Domesticated	100	12.8	10	26	16.2667
Domesticated	250	16.1	28.6	24	22.9
Domesticated	100	15.9	15.8	16.7	16.1333
Domesticated	50	13.3	19.4	31.8	21.5
Domesticated	50	33.3	29.3	32.4	31.6667
Domesticated	250	18.1	23.3	25.6	22.3333
Domesticated	50	35	18	20.3	24.4333
Domesticated	100	16	17	20.6	17.8667
Domesticated	50	26.4	23.3	20.9	23.5333
Domesticated	50	43.9	43.6	46.9	44.8
Domesticated	100	38.5	26.6	35.5	33.5333
Domesticated	100	38.1	45.2	49.4	44.2333
Domesticated	50	36.2	28.1	36	33.4333
Domesticated	50	32.8	26.1	41	33.3
Domesticated	250	23.6	25.1	24	24.2333
Domesticated	250	36.3	31.5	33.6	33.8
Wildtype	250	10.4	8.8	7.7	8.96667
Wildtype	50	17.9	10	17.9	15.2667
Wildtype	50	9.7	13.8	10.1	11.2
Wildtype	50	8.1	14.8	26.2	16.3667
Wildtype	50	9.5	12.6	9.1	10.4
Wildtype	50	16	15.9	11.8	14.5667
Wildtype	100	11.6	5.7	6.5	7.93333
Wildtype	50	17.6	10.7	6.9	11.7333
Wildtype	50	7.4	9	6.4	7.6
Wildtype	Control	15	6	9.4	10.1333
Wildtype	250	10.3	17.6	10.6	12.8333
Wildtype	250	11.5	20.4	12.5	14.8
Wildtype	250	8.6	9.8	7.7	8.7
Wildtype	250	9.8	9.2	8.2	9.06667
Wildtype	250	11.5	14.7	8.8	11.6667
Wildtype	100	9.3	14.9	26.6	16.9333
Wildtype	250	8.9	11.1	8.5	9.5
Wildtype	250	14.8	12.7	14.5	14
Wildtype	250	13.9	10.9	15.5	13.4333
Wildtype	50	7.3	7.2	8.2	7.56667
Wildtype	50	12.8	6.9	10.3	10
Wildtype	100	9.5	9.4	9.8	9.56667
Wildtype	250	12.3	8.5	17.2	12.6667
Wildtype	100	9.4	24.8	9.7	14.6333
Wildtype	100	10.8	9.8	9.6	10.0667
Wildtype	100	14.1	17.1	9.3	13.5
Wildtype	250	7.8	10	15.2	11
Wildtype	250	9.2	11.6	9.2	10
Wildtype	250	13.6	7.6	17	12.7333
Wildtype	250	18	11.7	29	19.5667
Wildtype	250	15.9	7.4	10.7	11.3333
Wildtype	250	11.4	13.4	13	12.6
Wildtype	250	12	7.5	15.9	11.8
Wildtype	250	8.9	12.7	15.4	12.3333
Wildtype	100	8.5	8.4	13.9	10.2667
Wildtype	100	7.7	5.5	5.7	6.3
Wildtype	100	16.4	12.6	26.1	18.3667
Wildtype	100	8.2	21	8.3	12.5
Wildtype	100	9.6	18.7	8.9	12.4
Wildtype	100	11.3	6.2	13.7	10.4
Wildtype	100	8.3	7.2	6.5	7.33333
Wildtype	100	9.4	7.9	13.9	10.4
Wildtype	250	31.1	23.9	26.2	27.0667
Wildtype	250	9.7	5.7	6.4	7.26667
Wildtype	Control	4.3	4.1	4.2	4.2
Wildtype	Control	3.9	13.4	3.2	6.83333
Wildtype	Control	11.1	3.2	26.1	13.4667
Wildtype	Control	4.5	14.6	9.2	9.43333
Wildtype	Control	19.5	7.5	5.8	10.9333
Wildtype	Control	6.6	13.3	11.5	10.4667
Wildtype	Control	7.3	5.7	5	6
Wildtype	Control	5	10.1	10.7	8.6
Wildtype	Control	20.3	15	26.8	20.7
Wildtype	Control	8.3	8	9.4	8.56667
Wildtype	Control	5.9	9.2	17.6	10.9
Wildtype	Control	5.7	8.6	10	8.1
Wildtype	Control	8.2	21.8	5.3	11.7667
Wildtype	Control	5.6	5.8	8.7	6.7
Wildtype	Control	6.5	4.1	13.2	7.93333
Wildtype	Control	5.5	9.7	6.5	7.23333
Wildtype	Control	8.6	4.7	11.5	8.26667
Wildtype	Control	9.7	11.5	9.5	10.2333
Wildtype	250	26.2	23.3	30.5	26.6667
Wildtype	100	12.3	11.2	10.2	11.2333
Wildtype	50	10.1	9.9	18.4	12.8
Wildtype	100	21	27.2	26.9	25.0333
Wildtype	50	21.8	26.3	20.2	22.7667
Wildtype	50	20.7	33	13.9	22.5333
Wildtype	100	15.8	19.6	28.5	21.3
Wildtype	50	29	41.7	37.6	36.1
Wildtype	50	13.6	21.4	16	17
Wildtype	250	9	10.3	14.1	11.1333
Wildtype	100	17.6	23	19.5	20.0333
Wildtype	250	21.3	14.9	26.5	20.9
Wildtype	100	22.9	27.4	16.3	22.2
Wildtype	100	17.9	23.2	35.4	25.5
Wildtype	250	19.3	28.9	19.9	22.7
Wildtype	100	20.5	27	37.1	28.2
Wildtype	100	17.4	33.5	19.8	23.5667
Wildtype	250	20.9	15.4	31	22.4333
Wildtype	100	23.4	13.5	15.6	17.5
Wildtype	250	27.6	34	29.8	30.4667
Wildtype	50	38.5	34	18.1	30.2
Wildtype	100	18.9	17.8	30.7	22.4667
Wildtype	100	11.9	13.6	7.6	11.0333
Wildtype	250	20.9	28.1	16.9	21.9667
Wildtype	50	21.4	25.5	27.9	24.9333
Wildtype	250	20	35.9	18.8	24.9
Wildtype	50	18.2	14.8	27.6	20.2
Wildtype	100	29.1	36.9	22.9	29.6333
Wildtype	50	15.8	19.5	23.5	19.6
Wildtype	100	27.9	13.8	17.6	19.7667
Wildtype	250	26	17.4	35.5	26.3
Wildtype	50	17	26.7	27.8	23.8333
