# Supplementary material for: Beneficial dose-dependent effects of Ag nanoparticles on germination do not compromise growth and metabolic profiles of Capsicum annuum seedlings
Source: PeerJ. 2025 Sep 9;13:e19974. doi: 10.7717/peerj.19974 (PMC12428529; doi:10.7717/peerj.19974)
Supplement: Supplemental Information 16 — The first column shows the chili plant variety: the domesticated variety corresponds to Serrano, while the wild variety corresponds to Chiltepin. The ”ID” column refers to the individual number assigned to each plant. The ”TPC” columns indicate the total polyphenol content measured at 28 and 42 days after germination. The ”CCI” columns represent the chlorophyll content recorded at 28 and 42 days after germination. Each of these column values is the mean of three measurements. Finally, the last two columns show the plant height measured at 28 and 42 days after germination. [file peerj-13-19974-s016.xlsx]

## Sheet: Total
Plant type	AgNP Treatment (ppm)	ID	TPC (mg GAE/g) mean 28 days	TPC (mg GAE/g) mean 42 days	CCI 28 days	CCI 42 days	Height (cm) 28 days	Height (cm) 42 days
Wildtype	Control	9	3.74597	2.39466	14.1333	9.43333	4.3	3.7
Wildtype	Control	10	1.6749	1.73401	14.3667	10.9333	3.5	4
Wildtype	Control	12	5.36378	2.05374	17.5333	10.4667	4.1	3.8
Wildtype	Control	13	2.54762	2.11649	16.7333	6	4.3	5.1
Wildtype	50	6	3.71323	1.68838	12.1667	11.2	3.1	4.7
Wildtype	50	7	3.8456	1.52182	14.4333	16.3667	4.1	3.8
Wildtype	50	8	2.82749	2.21467	12.6667	10.4	3.8	4.4
Wildtype	50	9	3.63707	1.69816	18.9667	14.5667	5.4	4.8
Wildtype	100	6	3.15287	1.48463	12.9333	16.9333	4.1	4.4
Wildtype	100	8	4.19643	1.95088	13.3333	9.56667	4.8	3.5
Wildtype	100	9	3.78571	1.91745	8.93333	14.6333	4.9	4.4
Wildtype	100	11	3.16718	2.27891	16.1333	10.0667	4.3	5.1
Wildtype	250	6	2.89254	5.7466	16.2333	12.8333	4.6	3.5
Wildtype	250	7	3.55922	0.463948	5.43333	14.8	4	3.5
Wildtype	250	8	3.90439	3.78042	13.5667	8.7	3.6	3.8
Wildtype	250	10	3.46599	1.62202	9.93333	9.06667	3.3	4.4
Domesticated	Control	6	2.41634	0.255921	25.6333	30	4.9	5.8
Domesticated	Control	7	4.7522	1.59396	10.0333	28.7	4.6	6.2
Domesticated	Control	8	3.23171	2.4118	16.8333	22.4667	5	6.4
Domesticated	Control	9	4.19195	1.95167	13.9	33.4	5	6.2
Domesticated	50	6	2.51026	3.05009	23.8	20.6	6.4	6.7
Domesticated	50	7	3.51863	2.37593	8.03333	20.7667	4.4	6.4
Domesticated	50	8	3.4669	1.65484	18.3333	30.2667	6.1	7.3
Domesticated	50	9	3.18902	2.74126	15.1333	23.5333	5.5	7.1
Domesticated	100	6	3.9913	1.32319	15.5333	15.8	2.7	6.3
Domesticated	100	7	4.20802	1.8757	22.7667	21.1333	4.5	6.5
Domesticated	100	8	4.86303	2.16729	21.2333	16.2667	3.7	5.7
Domesticated	100	9	4.08715	3.4847	19.7333	16.1333	5.6	6.7
Domesticated	250	6	3.3129	2.56929	19.0667	24.2333	3.7	6.3
Domesticated	250	7	3.53175	1.87323	16.4667	33.8	4	5.8
Domesticated	250	8	4.32312	2.63643	13.2667	29.0333	5.5	7.4
Domesticated	250	9	4.58392	2.43944	18.0333	19.8667	5.6	6.4
