# Supplementary material for: Beneficial dose-dependent effects of Ag nanoparticles on germination do not compromise growth and metabolic profiles of Capsicum annuum seedlings
Source: PeerJ. 2025 Sep 9;13:e19974. doi: 10.7717/peerj.19974 (PMC12428529; doi:10.7717/peerj.19974)
Supplement: Supplemental Information 17 — The first sheet contains measurements taken at 28 days after germination, while the second sheet corresponds to 42 days after germination. Each sheet contains the same measurements. The first column refers to the chili plant variety used: domesticated (Serrano) and wild (Chiltepin). The column titled ”ID” indicates the specific number assigned to each plant. The column titled ”Shoot” refers to measurements of the aerial part of the plant, including length, fresh weight, and dry weight. The column titled ”Root” refers to measurements of the root part of the plant, including length, fresh weight, and dry weight. The column titled ”Total” represents the sum of the aerial and root parts, giving the total measurements of the plants. [file peerj-13-19974-s017.xlsx]

## Sheet: 28 days after germination
Plant type	Treatment (ppm)	ID	Shoot length (cm)	Root length (cm)	Total length (cm)	Shoot wet mass (g)	Root wet mass (g)	Total wet mass (g)	Shoot dry mass (g)	Root dry mass (g)	Total dry mass
Wildtype	Control	1	4.3	7.6	11.9	0.0937	0.0459	0.1396	0.0115	0.0045	0.016
Wildtype	Control	5	3.5	9.5	13	0.1027	0.1059	0.2086	0.0138	0.0065	0.0203
Wildtype	Control	6	4.1	12.8	16.9	0.1007	0.0991	0.1998	0.0132	0.0043	0.0175
Wildtype	Control	7	4.3	10.3	14.6	0.107	0.1022	0.2092	0.0137	0.007	0.0207
Wildtype	Control	8	4.6	9.5	14.1	0.1443	0.2069	0.3512	0.0227	0.0115	0.0342
Wildtype	50	1	3.1	12	15.1	0.0862	0.0903	0.1765	0.0109	0.0061	0.017
Wildtype	50	2	4.1	9.7	13.8	0.0905	0.0871	0.1776	0.01	0.0031	0.0131
Wildtype	50	3	3.8	8.5	12.3	0.0835	0.0804	0.1639	0.0086	0.0031	0.0117
Wildtype	50	4	5.4	14.5	19.9	0.1279	0.2353	0.3632	0.0178	0.0091	0.0269
Wildtype	50	5	4.6	12.5	17.1	0.1346	0.2117	0.3463	0.0204	0.0088	0.0292
Wildtype	100	1	4.1	15	19.1	0.1072	0.1559	0.2631	0.0155	0.0094	0.0249
Wildtype	100	2	4.8	9.5	14.3	0.1073	0.1098	0.2171	0.0154	0.006	0.0214
Wildtype	100	3	4.9	10.4	15.3	0.1227	0.1134	0.2361	0.019	0.0063	0.0253
Wildtype	100	4	4.3	17.3	21.6	0.1246	0.1219	0.2465	0.0176	0.007	0.0246
Wildtype	100	5	4.1	11.9	16	0.1188	0.2169	0.3357	0.0175	0.0108	0.0283
Wildtype	250	1	4.6	12	16.6	0.1338	0.1251	0.2589	0.0201	0.0071	0.0272
Wildtype	250	2	4	9.4	13.4	0.1384	0.2373	0.3757	0.0208	0.011	0.0318
Wildtype	250	3	3.6	9	12.6	0.0496	0.0438	0.0934	0.0069	0.0022	0.0091
Wildtype	250	4	3.3	6.5	9.8	0.0691	0.0501	0.1192	0.0086	0.0026	0.0112
Wildtype	250	5	3.3	14.5	17.8	0.0736	0.0599	0.1335	0.0093	0.0025	0.0118
Domesticated	Control	1	4.9	9.7	14.6	0.1166	0.1142	0.2308	0.0163	0.0076	0.0239
Domesticated	Control	2	4.6	23	27.6	0.1952	0.0656	0.2608	0.0244	0.0078	0.0322
Domesticated	Control	3	5	11.5	16.5	0.2216	0.2033	0.4249	0.0277	0.105	0.1327
Domesticated	Control	4	5	12	17	0.1628	0.102	0.2648	0.0177	0.0054	0.0231
Domesticated	Control	5	5	7.5	12.5	0.1479	0.0537	0.2016	0.0193	0.0041	0.0234
Domesticated	50	1	6.4	13	19.4	0.1518	0.1064	0.2582	0.022	0.0076	0.0296
Domesticated	50	2	4.4	10.5	14.9	0.1425	0.1445	0.287	0.0206	0.0093	0.0299
Domesticated	50	3	6.1	13	19.1	0.1814	0.2019	0.3833	0.0249	0.0101	0.035
Domesticated	50	4	5.5	25	30.5	0.2361	0.3232	0.5593	0.0269	0.0166	0.0435
Domesticated	50	5	4.9	17	21.9	0.1585	0.2317	0.3902	0.025	0.0147	0.0397
Domesticated	100	1	2.7	9.6	12.3	0.1407	0.1916	0.3323	0.0197	0.0073	0.027
Domesticated	100	2	4.5	12.9	17.4	0.0912	0.1959	0.2871	0.0101	0.0087	0.0188
Domesticated	100	3	3.7	10.4	14.1	0.1283	0.2446	0.3729	0.0154	0.0114	0.0268
Domesticated	100	4	5.6	9.6	15.2	0.1397	0.2102	0.3499	0.0176	0.0099	0.0275
Domesticated	100	5	3.2	13	16.2	0.1809	0.2429	0.4238	0.0192	0.0109	0.0301
Domesticated	250	1	3.7	9.8	13.5	0.1855	0.2502	0.4357	0.0208	0.0123	0.0331
Domesticated	250	2	4	8.6	12.6	0.1901	0.2065	0.3966	0.023	0.0082	0.0312
Domesticated	250	3	5.5	14.6	20.1	0.15667	0.1728	0.32947	0.02	0.0094	0.0294
Domesticated	250	4	5.6	12.6	18.2	0.155	0.2057	0.3607	0.0199	0.0086	0.0285
Domesticated	250	5	4.2	16	20.2	0.0836	0.0353	0.1189	0.0059	0.0017	0.0076

## Sheet: 40 days after germination
Plant type	Treatment (ppm)	ID	Root length (cm)	Shoot length (cm)	Total length (cm)	Shoot wet mass (g)	Root wet mass (g)	Total wet mass (g)	Shoot dry mass	Root dry mass	Total dry mass
Wildtype	Control	14	12.6	3.7	16.3	0.2047	0.1134	0.3181	0.0222	0.0057	0.0279
Wildtype	Control	15	10.3	4	14.3	0.4856	0.3739	0.8595	0.0567	0.0154	0.0721
Wildtype	Control	16	13.1	3.8	16.9	0.2984	0.2003	0.4987	0.0362	0.0085	0.0447
Wildtype	Control	17	15.3	5.1	20.4	0.5735	0.443	1.0165	0.0805	0.0325	0.113
Wildtype	Control	18	14.6	4.6	19.2	0.4089	0.3289	0.7378	0.0511	0.0134	0.0645
Wildtype	50	10	10.6	4.7	15.3	0.3183	0.1875	0.5058	0.0326	0.012	0.0446
Wildtype	50	12	11.5	3.8	15.3	0.2885	0.137	0.4255	0.0234	0.0055	0.0289
Wildtype	50	13	11	4.4	15.4	0.2819	0.1647	0.4466	0.032	0.0079	0.0399
Wildtype	50	14	11.6	4.8	16.4	0.3375	0.2005	0.538	0.0368	0.011	0.0478
Wildtype	50	15	7.8	3.4	11.2	0.1118	0.2216	0.3334	0.0263	0.006	0.0323
Wildtype	100	12	10.1	4.4	14.5	0.2603	0.1706	0.4309	0.0277	0.0073	0.035
Wildtype	100	13	11.8	3.5	15.3	0.2731	0.1583	0.4314	0.0286	0.008	0.0366
Wildtype	100	14	12.7	4.4	17.1	0.4591	0.3579	0.817	0.054	0.0186	0.0726
Wildtype	100	15	17.5	5.1	22.6	0.4449	0.2915	0.7364	0.0546	0.015	0.0696
Wildtype	100	17	9	4.1	13.1	0.2671	0.1874	0.4545	0.0282	0.0099	0.0381
Wildtype	250	14	9.5	3.5	13	0.161	0.0612	0.2222	0.0173	0.0039	0.0212
Wildtype	250	15	13	3.5	16.5	0.2188	0.1512	0.37	0.0256	0.0066	0.0322
Wildtype	250	16	10.5	3.8	14.3	0.2026	0.096	0.2986	0.0211	0.0049	0.026
Wildtype	250	17	10	4.4	14.4	0.3002	0.1148	0.415	0.034	0.0066	0.0406
Wildtype	250	18	12.6	4.4	17	0.2708	0.1233	0.3941	0.0309	0.0077	0.0386
Domesticated	Control	10	13.5	5.8	19.3	0.5353	0.3623	0.8976	0.0533	0.017	0.0703
Domesticated	Control	11	10.1	6.2	16.3	0.302	0.0701	0.3721	0.035	0.0044	0.0394
Domesticated	Control	12	9.5	6.4	15.9	0.3147	0.283	0.5977	0.0308	0.0129	0.0437
Domesticated	Control	13	13	6.2	19.2	0.591	0.539	1.13	0.0747	0.0275	0.1022
Domesticated	Control	14	15.6	6.4	22	0.4665	0.4271	0.8936	0.0551	0.0201	0.0752
Domesticated	50	10	18.5	6.7	25.2	0.3157	0.1617	0.4774	0.0311	0.0109	0.042
Domesticated	50	11	9.1	6.4	15.5	0.3842	0.1397	0.5239	0.0345	0.0092	0.0437
Domesticated	50	12	15	7.3	22.3	0.3954	0.2222	0.6176	0.0402	0.0153	0.0555
Domesticated	50	14	14	7.1	21.1	0.5964	0.4079	1.0043	0.0575	0.0196	0.0771
Domesticated	50	15	15.5	6.4	21.9	0.5004	0.378	0.8784	0.0643	0.0215	0.0858
Domesticated	100	10	12.3	6.3	18.6	0.3921	0.1941	0.5862	0.0408	0.014	0.0548
Domesticated	100	11	10.5	6.5	17	0.3399	0.1686	0.5085	0.0327	0.0111	0.0438
Domesticated	100	12	11	5.7	16.7	0.3343	0.1834	0.5177	0.038	0.012	0.05
Domesticated	100	13	10	6.7	16.7	0.385	0.1235	0.5085	0.0407	0.0098	0.0505
Domesticated	100	14	14.9	5.9	20.8	0.3689	0.2002	0.5691	0.0394	0.0145	0.0539
Domesticated	250	10	13.1	6.3	19.4	0.2275	0.1739	0.4014	0.0237	0.0078	0.0315
Domesticated	250	11	14.5	5.8	20.3	0.3421	0.129	0.4711	0.0303	0.0089	0.0392
Domesticated	250	12	12.4	7.4	19.8	0.4676	0.2831	0.7507	0.0498	0.0149	0.0647
Domesticated	250	13	19.9	6.4	26.3	0.324	0.2109	0.5349	0.0435	0.0107	0.0542
Domesticated	250	14	13.2	6.4	19.6	0.5733	0.267	0.8403	0.0621	0.0192	0.0813
