# Supplementary material for: Beneficial dose-dependent effects of Ag nanoparticles on germination do not compromise growth and metabolic profiles of Capsicum annuum seedlings
Source: PeerJ journal article supplement (doi:10.7717/peerj.19974), 2025-09-09
Supplement: Supplemental_Figure_S1.pdf [file Supplemental_Figure_S1.pdf]

**Figure S1.** Total wet mass (g), Root wet mass (g) and Total length of domesticated and wild *C. annuum* plants after 42 days of germination at different AgNP concentrations (50, 100 and 250 ppm).

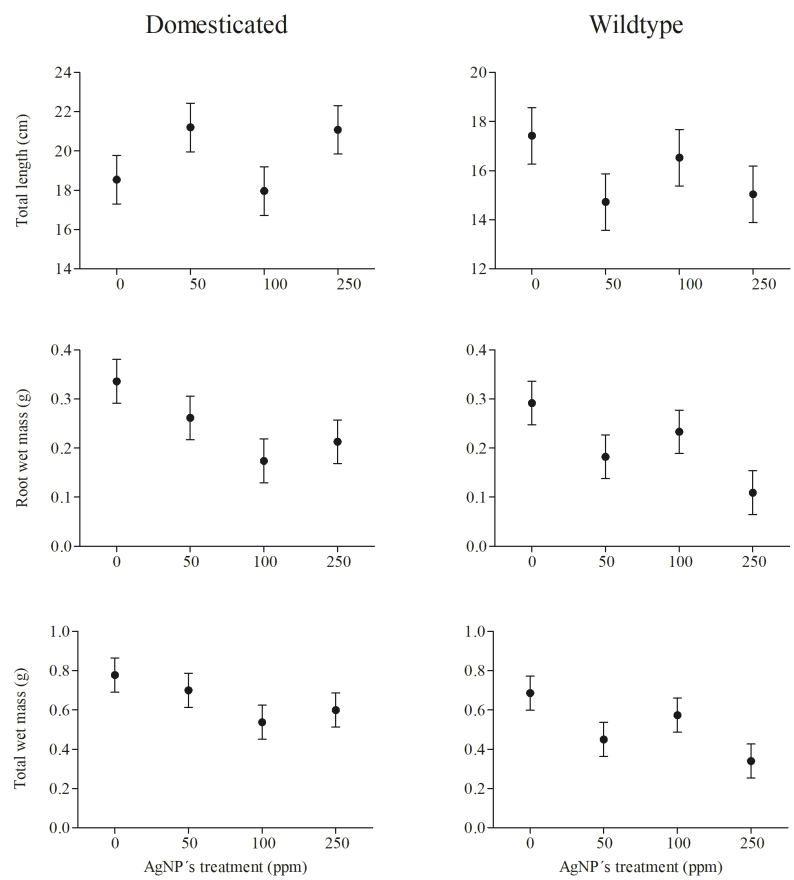

Commented [MOU1]: Borrar?
