# Supplementary material for: Beneficial dose-dependent effects of Ag nanoparticles on germination do not compromise growth and metabolic profiles of Capsicum annuum seedlings
Source: PeerJ journal article supplement (doi:10.7717/peerj.19974), 2025-09-09

**Figure S2.** Total polyphenol content (TPC) of 28- and 42-days post-germination wild and domesticated plants with each silver nanoparticle (AgNPs) treatment (50, 100 and 250 ppm).

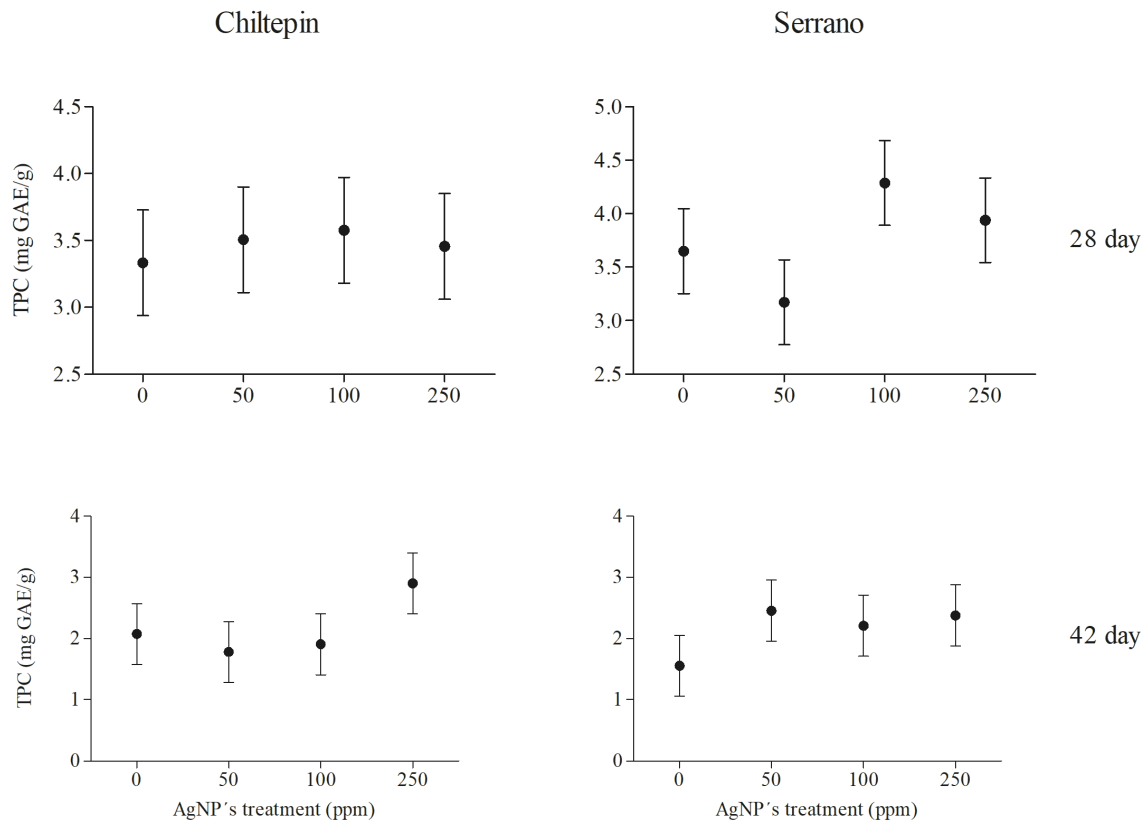

Supplement: Supplemental_Figure_S2.pdf [file Supplemental_Figure_S2.pdf]
