# Supplementary material for: Beneficial dose-dependent effects of Ag nanoparticles on germination do not compromise growth and metabolic profiles of Capsicum annuum seedlings
Source: PeerJ journal article supplement (doi:10.7717/peerj.19974), 2025-09-09

**Figure S3.** Chlorophyll content in leaves of 28- and 42-days post-germination wild (Chiltepin) and domesticated (Serrano) plants with each AgNP treatment (50, 100 and 250 ppm).

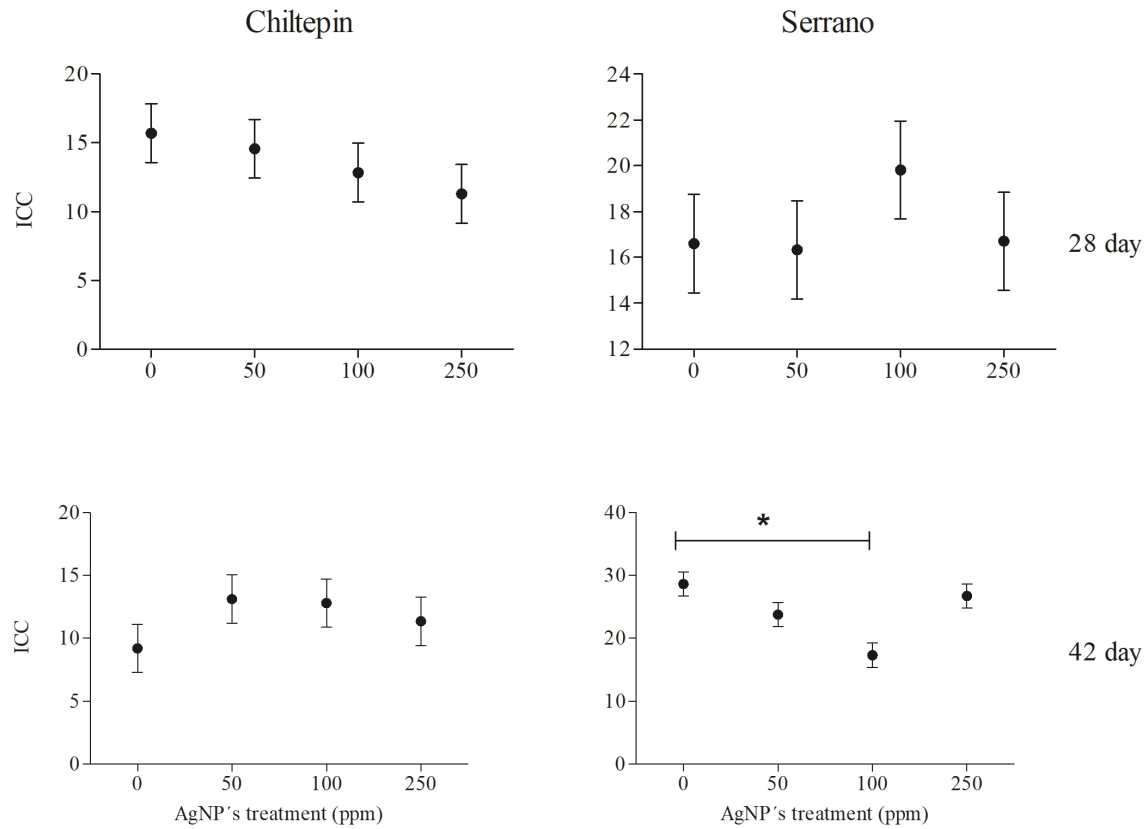

Supplement: Supplemental_Figure_S3.pdf [file Supplemental_Figure_S3.pdf]
